# Supplementary material for: Evaluating the Link between BAFF System Gene Expression and Acute Rejection Development in Kidney Transplantation
Source: MDPI journal article supplement (doi:10.3390/jcm11143956), 2022-07-07
Supplement: s1 [file s1]

**Supplementary Table S1.** Characteristics of the gene expression studies obtained from the GEO database used in the meta-analysis.

| <b>ID Study</b> | <b>Platform</b>                             | <b>Type of sample</b> | <b>Number of samples (NAR/AR)</b> | <b>Ref.</b> |
|-----------------|---------------------------------------------|-----------------------|-----------------------------------|-------------|
| GSE14346        | Affymetrix Human Genome U133 Plus 2.0 Array | SP                    | 40/30                             | [26]        |
| GSE15296        | Affymetrix Human Genome U133 Plus 2.0 Array | SP                    | 46/51                             | [27]        |
| GSE46474        | Affymetrix Human Genome U133 Plus 2.0 Array | SP                    | 20/20                             | [28]        |
| GSE36059        | Affymetrix Human Genome U133 Plus 2.0 Array | B                     | 281/122                           | [29]        |
| GSE21374        | Affymetrix Human Genome U133 Plus 2.0 Array | B                     | 206/76                            | [30]        |

SP, Peripheral Blood; B, Biopsy; NAR, Non-Acute Rejection; AR, Acute Rejection
